# Supplementary material
Source: PubMed Central journal article supplement (PMC8369681)
Supplement: pt0c00162_si_001.pdf [file pt0c00162_si_001.pdf]

## Supplemental Info

# Discovery of the first selective M<sub>4</sub> muscarinic acetylcholine receptor antagonists with *in vivo* anti-parkinsonian and anti-dystonic efficacy

Mark S. Moehle<sup>1,2</sup>, Aaron M. Bender<sup>1</sup>, Jonathan W. Dickerson<sup>1</sup>, Daniel J. Foster<sup>1,3</sup>, Aidong Qi<sup>1</sup>, Hyekyung P. Cho, Yuping Donsante<sup>4</sup>, Weimin Peng<sup>1</sup>, Zoey Bryant<sup>1</sup>, Kaylee J. Stillwell<sup>1</sup>, Thomas M. Bridges<sup>1</sup>, Sichen Chang<sup>1</sup>, Katherine J. Watson<sup>1</sup>, Jordan C. O'Neill<sup>1</sup>, Julie L. Engers<sup>1</sup>, Li Peng<sup>1</sup>, Alice L. Rodriguez<sup>1</sup>, Colleen M. Niswender<sup>1,3</sup>, Craig W. Lindsley<sup>1</sup>, Ellen J. Hess<sup>4</sup>, P. Jeffrey Conn<sup>1,3\*</sup>, and Jerri M. Rook<sup>1\*</sup>.

<sup>1</sup> Department of Pharmacology, Warren Center for Neuroscience Drug Discovery, Vanderbilt University, Nashville, TN, 37232, United States

<sup>2</sup> Department of Pharmacology & Therapeutics, Center for Translational Research in Neurodegeneration, University of Florida, Gainesville, FL, 32610, United States

<sup>3</sup> Vanderbilt Kennedy Center, Vanderbilt University, Nashville, TN, 37232, United States

<sup>4</sup> Department of Pharmacology & Chemical Biology, Emory University, Atlanta, Georgia, 30322, United States

### \*Corresponding Authors

Jerri M. Rook: Department of Pharmacology, Warren Center for Neuroscience Drug Discovery, Vanderbilt University, Nashville, TN, 37232, United States. Email: [jerri.m.rook@vanderbilt.edu](mailto:jerri.m.rook@vanderbilt.edu)

P. Jeffrey Conn: Department of Pharmacology, Warren Center for Neuroscience Drug Discovery, and Vanderbilt Kennedy Center Vanderbilt University, Nashville, TN, 37232, United States. Email: [Jeffrey.conn@vanderbilt.edu](mailto:Jeffrey.conn@vanderbilt.edu)

**Table of Contents**

Scheme S1. Chemistry Supporting Information..... S-3 to S-6

Table S1. Radioligand binding data for stable cell lines.....S-7

Table S2. Ancillary Pharmacology of VU6021625.....S-8 to S-11

Figure S1. VU6021625 does not alter spontaneous locomotion.....S-12

Figure S2. Wildtype and M<sub>4</sub> knockout mouse haloperidol induced catalepsy.....S-13

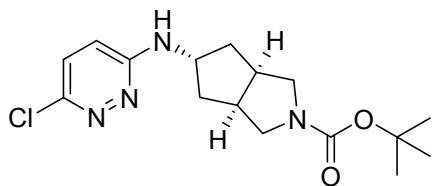

**tert-butyl (3aR,5s,6aS)-5-((6-chloropyridazin-3-yl)amino)hexahydrocyclopenta[c]pyrrole-2(1H)-carboxylate (3).** Tert-butyl (3aR,5s,6aS)-5-aminohexahydrocyclopenta[c]pyrrole-2(1H)-carboxylate (5.0 g, 22.1 mmol, 1 eq) and 3,6-dichloropyridazine (9.87 g, 66.3 mmol, 3 eq) were combined in tert-butanol (30 mL), and DIPEA (11.5 mL, 66.3 mmol, 3 eq) was added. The resulting solution was heated to 150 °C under microwave irradiation for 2 h, after which time the reaction mixture was concentrated under reduced pressure, and crude residue was purified by column chromatography (3-100% EtOAc in hexanes) to give the title compound as a white solid (4.87 g, 65%).

<sup>1</sup>H-NMR (400 MHz, MeOD) δ 7.27 (d, *J* = 9.4 Hz, 1H), 6.87 (d, *J* = 9.4 Hz, 1H), 4.41 (p, *J* = 6.3 Hz, 1H), 3.55 (dd, *J* = 11.1, 8.0 Hz, 2H), 3.19 (dd, *J* = 11.4, 3.8 Hz, 2H), 2.90 – 2.80 (m, 2H), 1.90 – 1.92 (m, 2H), 1.89 – 1.81 (m, 2H), 1.46 (s, 9H).

<sup>13</sup>C-NMR (101 MHz, MeOD) δ 159.3, 156.3, 146.8, 130.3, 120.5, 80.8, 53.7, 53.2 (*signal broadening is observed*) 42.3 (*signal broadening is observed*), 39.5, 28.8.

ES-MS [*M*+H]<sup>+</sup> = 283.2 (- t-butyl).

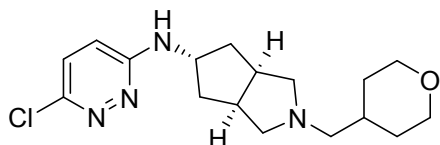

**(3aR,5s,6aS)-N-(6-chloropyridazin-3-yl)-2-((tetrahydro-2H-pyran-4-yl)methyl)octahydrocyclopenta[c]pyrrol-5-amine (5).** Tert-butyl (3aR,5s,6aS)-5-((6-chloropyridazin-3-yl)amino)hexahydrocyclopenta[c]pyrrole-2(1H)-carboxylate (3) (4.86 g, 14.3 mmol, 1 eq) was dissolved in 1,4-dioxane (70 mL) and MeOH (20 mL), and 4M HCl in dioxanes solution (50 mL) was added dropwise. The resulting solution was stirred at r.t. for 1 h, after which time solvents were concentrated under reduced pressure to give the HCl salt as a white solid, which was dried under vacuum and used without additional purification (3.95 g, 100%). The HCl salt was then suspended in DCM (40 mL) and THF (50 mL), and tetrahydro-2H-pyran-4-carbaldehyde (2.29 g, 20.1 mmol, 1.4 eq) was added, followed by sodium triacetoxyborohydride (6.08 g, 28.9 mmol, 2 eq). The resulting solution was stirred at r.t. for 1.5 h, after which time the reaction mixture was quenched with sat. NaHCO<sub>3</sub>, and extracted with DCM. Combined organic extracts were washed with brine, and dried over MgSO<sub>4</sub>. Solvents were filtered and concentrated to give the title compound as a white solid (4.31 g, 89% over 2 steps).

<sup>1</sup>H-NMR (400 MHz, MeOD) δ 7.26 (d, *J* = 9.4 Hz, 1H), 6.86 (d, *J* = 9.4 Hz, 1H), 4.43 – 4.36 (m, 1H), 3.93 (dd, *J* = 11.3, 3.7 Hz, 2H), 3.42 (td, *J* = 11.9, 1.9 Hz, 2H), 2.84 – 2.68 (m, 4H), 2.31 (d, *J* = 6.8 Hz, 2H), 2.27 – 2.17 (m, 2H), 1.91 (ddd, *J* = 12.9, 5.9, 2.1 Hz, 2H), 1.83 – 1.64 (m, 5H), 1.32 – 1.21 (m, 2H).

$^{13}\text{C}$ -NMR (101 MHz, MeOD)  $\delta$  159.7, 146.6, 130.3, 120.4, 68.9, 63.5, 62.9, 53.4, 41.5, 39.1, 35.3, 32.9.

ES-MS  $[\text{M}+\text{H}]^+ = 337.2$ .

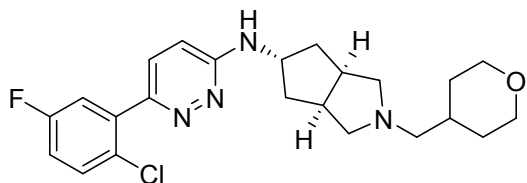

**(3aR,5s,6aS)-N-(6-(2-chloro-5-fluorophenyl)pyridazin-3-yl)-2-((tetrahydro-2H-pyran-4-yl)methyl)octahydrocyclopenta[c]pyrrol-5-amine (6, VU6013720)** (3aR,5s,6aS)-N-(6-chloropyridazin-3-yl)-2-((tetrahydro-2H-pyran-4-yl)methyl)octahydrocyclopenta[c]pyrrol-5-amine (**5**) (100 mg, 0.30 mmol, 1 eq), 2-chloro-5-fluorophenylboronic acid (62 mg, 0.36 mmol, 1.2 eq), potassium carbonate (125 mg, 0.89 mmol, 3 eq) and BrettPhos-Pd-G3 (27 mg, 0.030 mmol, 0.1 eq) were combined in a vial, and 5:1 1,4-dioxane/ $\text{H}_2\text{O}$  solution (5 mL total, degassed under vacuum) was added via syringe. The resulting mixture was stirred under an inert atmosphere at 100 °C for 2.5 h, after which time the reaction mixture was cooled to r.t. and diluted with water and DCM. The aqueous layer was extracted with DCM, and combined organic extracts were filtered through a phase separator and concentrated. Crude residue was purified by RP-HPLC (10-50% MeCN in 0.1% TFA aqueous solution over 20 min). Fractions containing product were basified with sat.  $\text{NaHCO}_3$ , and extracted with DCM. Combined organic extracts were dried over  $\text{MgSO}_4$ , filtered and concentrated under reduced pressure to give the title compound as a white solid (40 mg, 31%).

$^1\text{H}$ -NMR (400 MHz, MeOD)  $\delta$  7.57 – 7.52 (m, 2H), 7.35 (dd,  $J = 9.0, 3.1$  Hz, 1H), 7.20 (ddd,  $J = 8.8, 7.9, 3.1$  Hz, 1H), 6.91 (d,  $J = 9.3$  Hz, 1H), 4.56 – 4.48 (m, 1H), 3.94 (dd,  $J = 11.2, 3.5$  Hz, 2H), 3.43 (td,  $J = 11.9, 1.9$  Hz, 2H), 2.87 – 2.74 (m, 4H), 2.34 (d,  $J = 6.9$  Hz, 2H), 2.26 (dd,  $J = 8.4, 4.0$  Hz, 2H), 1.97 (ddd,  $J = 12.9, 5.9, 2.1$  Hz, 2H), 1.84 – 1.70 (m, 5H), 1.34 – 1.22 (m, 2H).

$^{13}\text{C}$ -NMR (101 MHz, MeOD)  $\delta$  162.8 (d,  $J = 246.1$  Hz), 159.7, 150.95 (d,  $J = 1.9$  Hz), 139.8 (d,  $J = 8.1$  Hz), 132.8 (d,  $J = 8.5$  Hz), 130.5, 128.6 (d,  $J = 3.3$  Hz), 118.9 (d,  $J = 24.1$  Hz), 118.0 (d,  $J = 23.0$  Hz), 116.2, 68.9, 63.6, 63.0, 53.3, 41.5, 39.3, 35.3, 33.0.

ES-MS  $[\text{M}+\text{H}]^+ = 431.4$ .

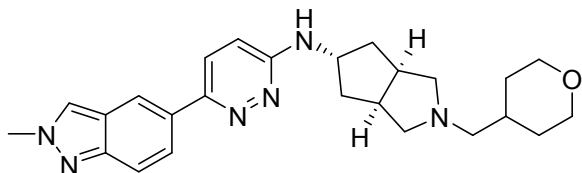

**(3aR,5s,6aS)-N-(6-(2-methyl-2H-indazol-5-yl)pyridazin-3-yl)-2-((tetrahydro-2H-pyran-4-yl)methyl)octahydrocyclopenta[c]pyrrol-5-amine (7, VU6021625).** (3aR,5s,6aS)-N-(6-chloropyridazin-3-yl)-2-((tetrahydro-2H-pyran-4-yl)methyl)octahydrocyclopenta[c]pyrrol-5-amine (**5**) (1.0 g, 2.97 mmol, 1 eq), 2-methylindazole-5-boronic acid pinacol ester (996 mg, 3.86 mmol, 1.3 eq), potassium carbonate (1.25 g, 8.91 mmol, 3 eq) and BrettPhos-Pd-G3 (269 mg, 0.30 mmol, 0.1 eq) were combined in a vial, and 5:1 1,4-dioxane/H<sub>2</sub>O solution (15 mL total, degassed under vacuum) was added via syringe. The resulting mixture was stirred under an inert atmosphere at 100 °C for 3 h, after which time the reaction mixture was cooled to r.t. and diluted with water and DCM. The aqueous layer was extracted with DCM, and combined organic extracts were dried over MgSO<sub>4</sub>, filtered and concentrated under reduced pressure. Crude residue was purified by RP-HPLC (20-60% MeCN in 0.05% NH<sub>4</sub>OH aqueous solution over 20 min). Fractions containing product were concentrated to give the title compound as a white solid (431 mg, 34%).

<sup>1</sup>H-NMR (400 MHz, MeOD) δ 8.27 (s, 1H), 8.17 (dd, *J* = 1.7, 0.9 Hz, 1H), 7.95 (dd, *J* = 9.1, 1.7 Hz, 1H), 7.78 (d, *J* = 9.4 Hz, 1H), 7.67 (dt, *J* = 9.1, 1.0 Hz, 1H), 6.93 (d, *J* = 9.4 Hz, 1H), 4.54 – 4.47 (m, 1H), 4.23 (s, 3H), 3.94 (dd, *J* = 11.0, 3.4 Hz, 2H), 3.43 (td, *J* = 11.9, 2.0 Hz, 2H), 2.91 – 2.73 (m, 4H), 2.36 (d, *J* = 6.9 Hz, 2H), 2.30 – 2.26 (m, 2H), 2.00 – 1.95 (m, 2H), 1.85 – 1.70 (m, 5H), 1.33 – 1.22 (m, 2H).

<sup>13</sup>C-NMR (101 MHz, MeOD) δ 159.3, 152.5, 150.1, 131.9, 127.4, 127.3, 126.3, 123.6, 119.0, 117.8, 68.9, 63.5, 62.9, 53.3, 41.5, 40.3, 39.2, 35.2, 32.9. *Note: 1 aromatic signal is obscured.*

ES-MS [M+H]<sup>+</sup> = 433.0.

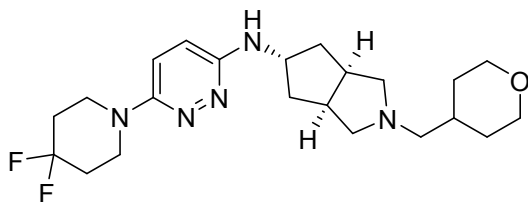

**(3aR,5s,6aS)-N-(6-(4,4-difluoropiperidin-1-yl)pyridazin-3-yl)-2-((tetrahydro-2H-pyran-4-yl)methyl)octahydrocyclopenta[c]pyrrol-5-amine (8, VU6021302).** (3aR,5s,6aS)-N-(6-chloropyridazin-3-yl)-2-((tetrahydro-2H-pyran-4-yl)methyl)octahydrocyclopenta[c]pyrrol-5-amine (**5**) (1.0 g, 2.96 mmol, 1 eq) and 4,4-difluoropiperidine hydrochloride (4.68 g, 29.7 mmol, 10 eq) were combined in NMP (10 mL), and DIPEA (5.17 mL, 29.7 mmol, 10 eq) was added. The resulting solution was stirred under microwave irradiation at 200 °C for 2 h, after which time the reaction mixture was purified directly by RP-HPLC (25-65% MeCN in 0.05% NH<sub>4</sub>OH aqueous solution over 20 min). Fractions containing product were concentrated to give the title compound as a slightly tan solid (797 mg, 64%).

<sup>1</sup>H-NMR (400 MHz, MeOD) δ 7.18 (d, *J* = 9.7 Hz, 1H), 6.81 (d, *J* = 9.7 Hz, 1H), 4.36 – 4.29 (m, 1H), 3.93 (dd, *J* = 11.1, 3.4 Hz, 2H), 3.57 – 3.54 (m, 4H), 3.42 (td, *J* = 11.8, 2.0 Hz, 2H), 2.88 – 2.86 (m, 2H), 2.79 – 2.69 (m, 2H), 2.34 (d, *J* = 6.9 Hz, 2H), 2.23 (dd, *J* = 9.3, 5.1 Hz, 2H), 2.08 – 1.98 (m, 4H), 1.91 (ddd, *J* = 12.9, 6.1, 2.3 Hz, 2H), 1.83 – 1.62 (m, 5H), 1.31 – 1.21 (m, 2H).

$^{13}\text{C}$ -NMR (101 MHz, MeOD)  $\delta$  155.9, 155.7, 123.3 (t,  $J = 240.8$  Hz), 120.8, 120.7, 68.9, 63.5, 62.9, 53.4, 45.2 (t,  $J = 5.2$  Hz), 41.4, 39.2, 35.2, 34.3 (t,  $J = 23.0$  Hz), 32.9.

ES-MS  $[\text{M}+\text{H}]^+ = 422.5$ .

**Scheme S1.** Chemistry Supporting Information. Additional synthesis,  $^1\text{H}$ -NMR, and  $^{13}\text{C}$ -NMR details for intermediates and final compounds

|                | [ <sup>3</sup> H] NMS Kd (nM) | Bmax (fmol/mg) |
|----------------|-------------------------------|----------------|
| ratM1-CHO      | 0.088 ± 0.013                 | 1305 ± 208     |
| ratM2/Gqi5-CHO | 0.155 ± 0.016                 | 2146 ± 223     |
| ratM3-CHO      | 0.077 ± 0.007                 | 1126 ± 123     |
| ratM4/Gqi5-CHO | 0.067 ± 0.022                 | 2178 ± 731     |
| ratM5-CHO      | 0.235 ± 0.041                 | 1701 ± 258     |
| hM1-CHO        | 0.075 ± 0.004                 | 1479 ± 129     |
| hM2/Gqi5-CHO   | 0.114 ± 0.012                 | 2089 ± 561     |
| hM3-CHO        | 0.116 ± 0.014                 | 2233 ± 737     |
| hM4/Gqi5-CHO   | 0.041 ± 0.004                 | 703 ± 103      |
| hM5-CHO        | 0.376 ± 0.088                 | 2633 ± 97      |

**Table S1.** Radioligand binding data for stable cell lines. Kd and Bmax values for cell lines stably expressing rat or human muscarinic receptor subtypes. Values are from at least 3 replicates.

| Target                                  | Radioligand                      | Species | % Inhibition |
|-----------------------------------------|----------------------------------|---------|--------------|
| Adenosine A1                            | [3H] DPCPX                       | Human   | 12           |
| Adenosine A2A                           | [3H] CGS-21680                   | Human   | 5            |
| Adenosine A3                            | [125I] AB-MECA                   | Human   | 10           |
| Adrenergic $\alpha$ 1A                  | [3H] Prazosin                    | Rat     | 13           |
| Adrenergic $\alpha$ 1B                  | [3H] Prazosin                    | Rat     | 3            |
| Adrenergic $\alpha$ 1D                  | [3H] Prazosin                    | Human   | 17           |
| Adrenergic $\alpha$ 2A                  | [3H] Rauwolscine                 | Human   | 18           |
| Adrenergic $\beta$ 1                    | [125I] Cyanopindolol             | Human   | 6            |
| Adrenergic $\beta$ 2                    | [3H] CGP-12177                   | Human   | 0            |
| Androgen (Testosterone)                 | [3H] Methyltrienolone            | Human   | -13          |
| Bradykinin B1                           | [3H] (Des-Arg10, Leu9)- Kallidin | Human   | -10          |
| Bradykinin B2                           | [3H] Bradykinin                  | Human   | -7           |
| Calcium Channel L-Type, Benzothiazepine | [3H] Diltiazem                   | Human   | 7            |
| Calcium Channel L-Type, Dihydropyridine | [3H] Nitrendipine                | Rat     | 1            |
| Calcium Channel N-Type                  | [125I] $\omega$ -Conotoxin GVIA  | Rat     | -9           |
| Cannabinoid CB1                         | [3H] SR141716A                   | Rat     | -3           |
| Dopamine D1                             | [3H] SCH-23390                   | Human   | 2            |
| Dopamine D2S                            | [3H] Spiperone                   | Human   | 17           |
| Dopamine D3                             | [3H] Spiperone                   | Human   | 34           |
| Dopamine D4.4                           | [3H] Spiperone                   | Human   | 3            |



|                                     |                                       |       |     |
|-------------------------------------|---------------------------------------|-------|-----|
| Endothelin ETA                      | [125I] Endothelin-1                   | Human | -11 |
| Endothelin ETB                      | [125I] Endothelin-1                   | Human | 2   |
| Epidermal Growth Factor (EGF)       | [125I] EGF                            | Human | -5  |
| Estrogen ER $\alpha$                | [3H] Estradiol                        | Human | -3  |
| GABAA,<br>Flunitrazepam,<br>Central | [3H] Flunitrazepam                    | Rat   | -4  |
| GABAA, Muscimol,<br>Central         | [3H] Muscimol                         | Rat   | -11 |
| GABAB1A                             | [3H] CGP-54626                        | Human | 2   |
| Glucocorticoid                      | [3H]<br>Dexamethasone                 | Human | -2  |
| Glutamate, Kainate                  | [3H] Kainic acid                      | Rat   | 6   |
| Glutamate, NMDA,<br>Agonism         | [3H] CGP-39653                        | Rat   | -5  |
| Glutamate, NMDA,<br>Glycine         | [3H] MDL 105,519                      | Rat   | -12 |
| Glutamate, NMDA,<br>Phencyclidine   | [3H] TCP                              | Rat   | -1  |
| Histamine H1                        | [3H] Pyrilamine                       | Human | 25  |
| Histamine H2                        | [125I]<br>Aminopotentidine            | Human | -3  |
| Histamine H3                        | [3H] N- $\alpha$ -<br>Methylhistamine | Human | 88  |
| Imidazoline I2,<br>Central          | [3H] Idazoxan                         | Rat   | 2   |
| Interleukin IL-1 R1                 | [125I] Interleukin-<br>1 $\beta$      | Human | -7  |
| Leukotriene,<br>Cysteinyl CysLT1    | [3H] LTD4                             | Human | 12  |

|                                                  |                                        |       |     |
|--------------------------------------------------|----------------------------------------|-------|-----|
| Melatonin MT1                                    | [125I] 2-Iodomelatonin                 | Human | -2  |
| Muscarinic M1                                    | [3H] N-Methylscopolamine               | Human | 33  |
| Muscarinic M2                                    | [3H] N-Methylscopolamine               | Human | 85  |
| Muscarinic M3                                    | [3H] N-Methylscopolamine               | Human | 51  |
| Neuropeptide Y Y1                                | [125I] Peptide YY                      | Human | -13 |
| Neuropeptide Y Y2                                | [125I] Peptide YY                      | Human | -2  |
| Nicotinic Acetylcholine $\alpha$ 1, Bungarotoxin | [125I] $\alpha$ -Bungarotoxin          | Human | -1  |
| Nicotinic Acetylcholine $\alpha$ 3 $\beta$ 4     | [125I] Epibatidine                     | Human | 55  |
| Opiate $\delta$ 1 (OP1, DOP)                     | [3H] Naltrindole                       | Human | -1  |
| Opiate $\kappa$ (OP2, KOP)                       | [3H] Diprenorphine                     | Human | 5   |
| Opiate $\mu$ (OP3, MOP)                          | [3H] Diprenorphine                     | Human | 6   |
| Phorbol Ester                                    | [3H] PDBu                              | Mouse | 9   |
| Platelet Activating Factor (PAF)                 | [3H] PAF                               | Human | -4  |
| Potassium Channel [KATP]                         | [3H] Glyburide                         | Human | 11  |
| Potassium Channel hERG                           | [3H] Astemizole                        | Human | 23  |
| Prostanoid EP4                                   | [3H] Prostaglandin E2                  | Human | 0   |
| Purinergic P2X                                   | [3H] $\alpha$ , $\beta$ -Methylene-ATP | Rat   | 4   |
| Rolipram                                         | [3H] Rolipram                          | Rat   | 0   |

|                                                     |                                 |       |     |
|-----------------------------------------------------|---------------------------------|-------|-----|
| Serotonin (5-Hydroxytryptamine) 5-HT1A              | [3H] 8-OH-DPAT                  | Human | 6   |
| Serotonin (5-Hydroxytryptamine) 5-HT2B              | [3H] Lysergic acid diethylamide | Human | 53  |
| Serotonin (5-Hydroxytryptamine) 5-HT3               | [3H] GR-65630                   | Human | -2  |
| Sigma $\sigma$ 1                                    | [3H] Haloperidol                | Human | 38  |
| Sodium Channel, Site 2                              | [3H] Batrachotoxinin            | Rat   | 15  |
| Tachykinin NK1                                      | [3H] Substance P                | Human | -10 |
| Thyroid Hormone                                     | [125I] Triiodothyronine         | Rat   | -21 |
| Transporter, Dopamine (DAT)                         | [125I] RTI-55                   | Human | 15  |
| Transporter, GABA                                   | [3H] GABA                       | Rat   | -5  |
| Transporter, Norepinephrine (NET)                   | [125I] RTI-55                   | Human | 15  |
| Transporter, Serotonin (5-Hydroxytryptamine) (SERT) | [3H] Paroxetine                 | Human | -1  |

**Table S2.** Ancillary Pharmacology of VU6021625. Eurofins panel showing binding of VU6021625 to a screen of 88 different receptors, transporters and enzymes.

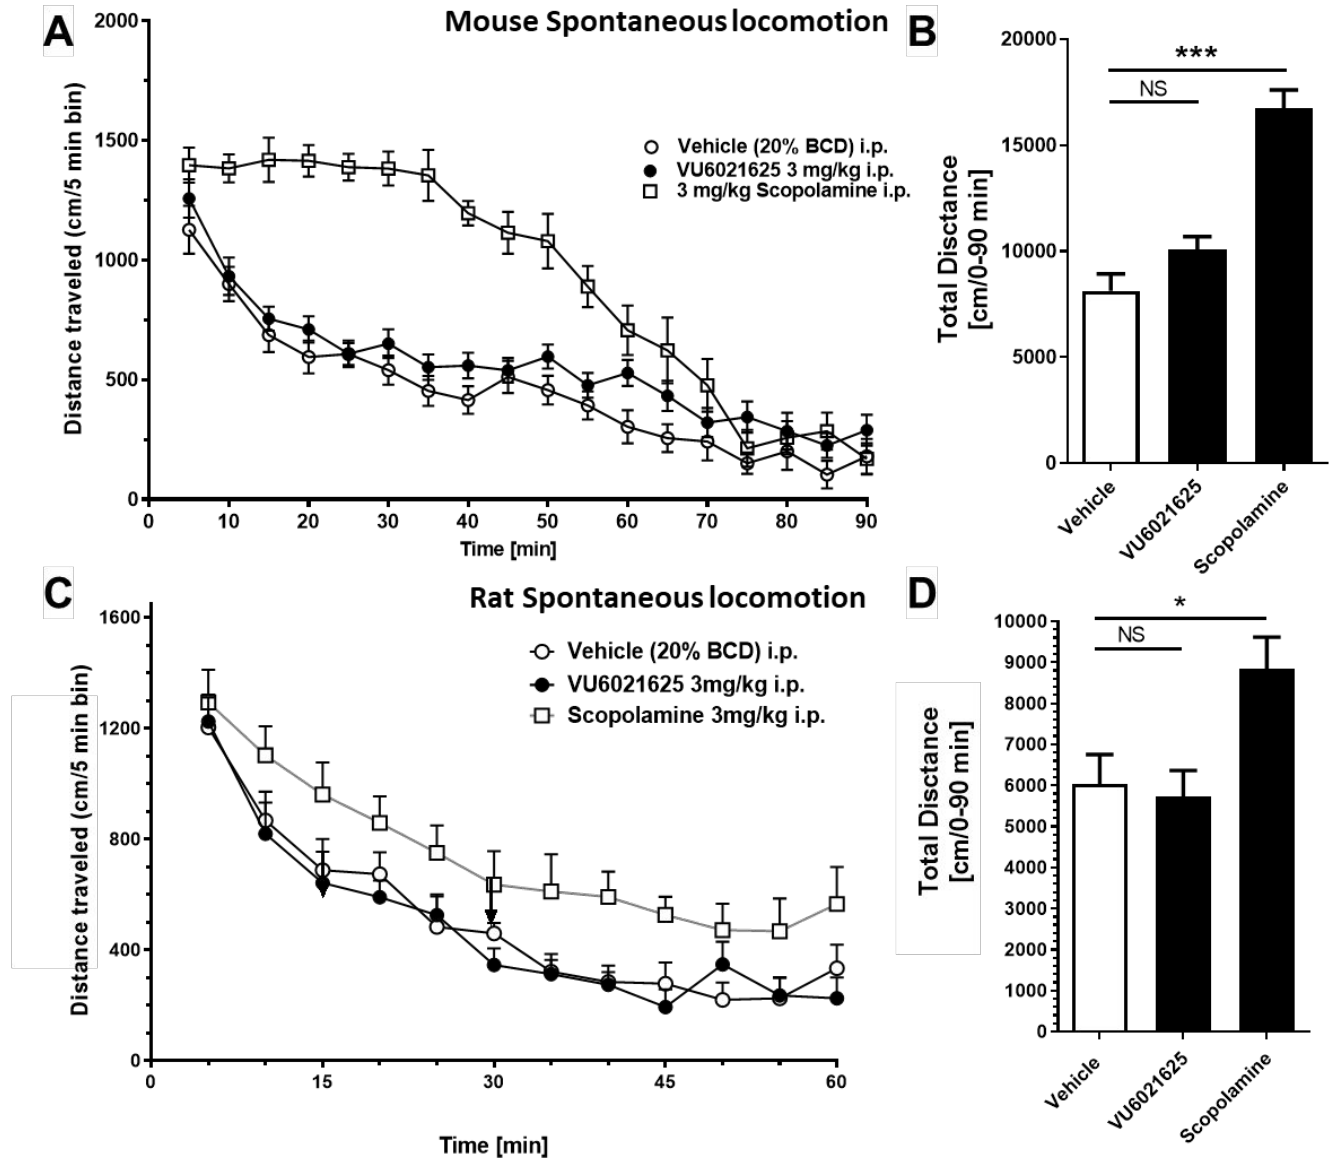

**Figure S1.** VU6021625 does not alter spontaneous locomotion. Unlike scopolamine (3 mg/kg, i.p.), VU6021625 (3 mg/kg, i.p.) does not increase spontaneous locomotor activity in either mice (A-B) or rats (C-D), (A, C time activity curve; B, D total distance travelled after vehicle, VU6021625, or scopolamine administration). Mouse N=12 per group. Rat N=8 per group. One way ANOVA with Dunnett's post-hoc test \*\* $p < 0.01$ , \*\*\* $p < 0.001$ , NS, not significant.

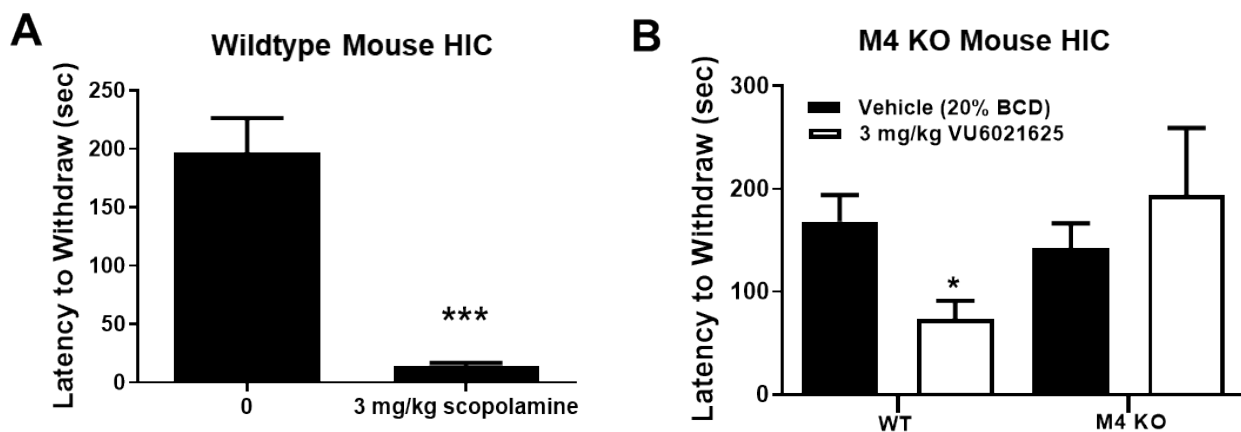

**Figure S2.** Wildtype and M<sub>4</sub> knockout mouse haloperidol induced catalepsy. Comparison group of a maximally efficacious dose of scopolamine in reversing catalepsy (A). Systemic administration of VU6021625 demonstrates efficacy in reversing catalepsy in wildtype, but not M<sub>4</sub> global knockout animals (B). N=8 per group. Student's t test per. N=4-12 per group. One way ANOVA with Dunnett's post-hoc test \*\*p<0.01, \*\*\*p<0.001, NS, not significant
